# Supplementary figures and images for: Recently Registered Midazolam Doses for Preterm Neonates Do Not Lead to Equal Exposure: A Population Pharmacokinetic Model
Source: PubMed Central journal article supplement — J Clin Pharmacol. 2019 May 15;59(10):1300–8. doi: 10.1002/jcph.1429 (PMC6767398; doi:10.1002/jcph.1429), 2019-05-15

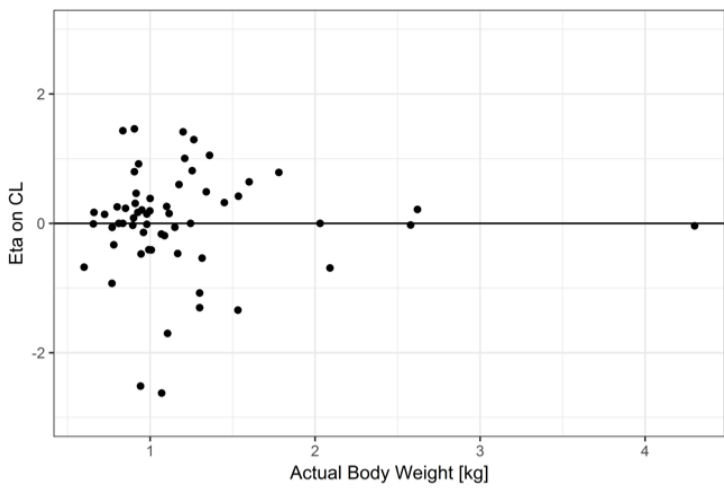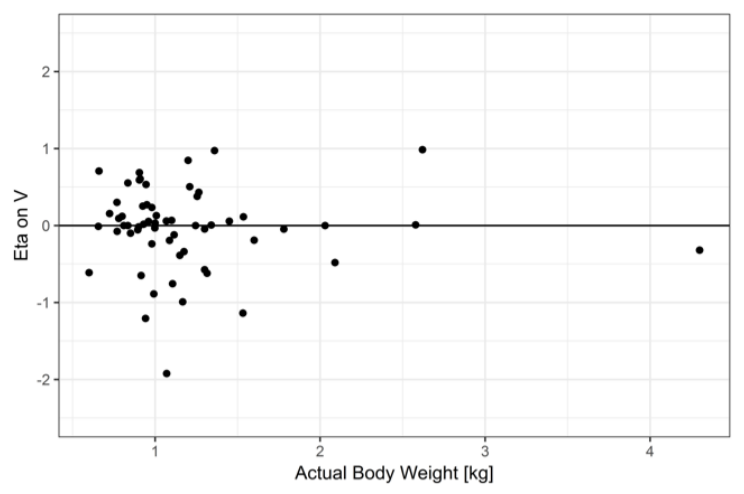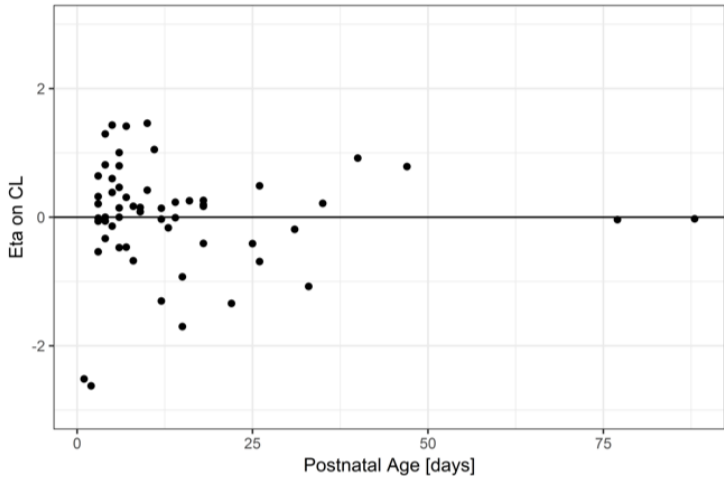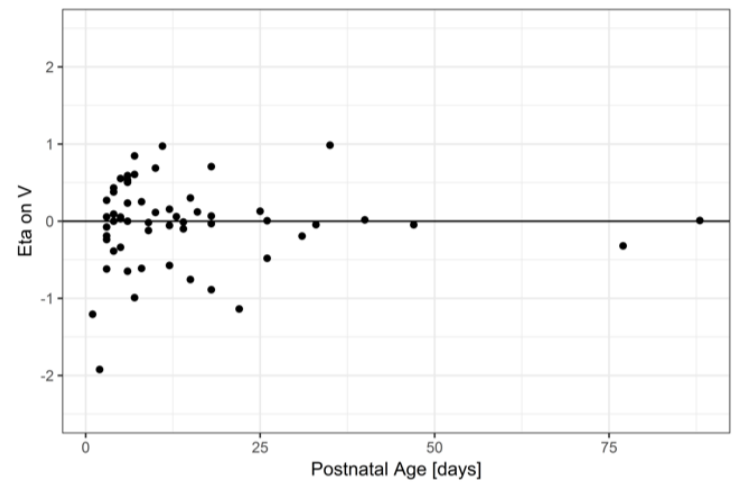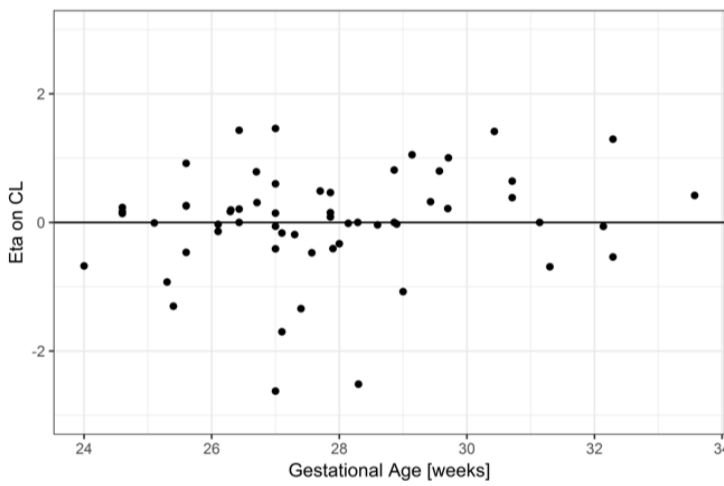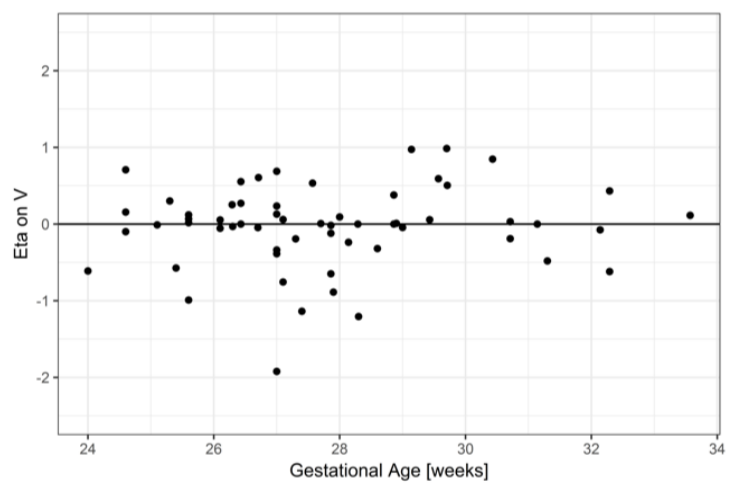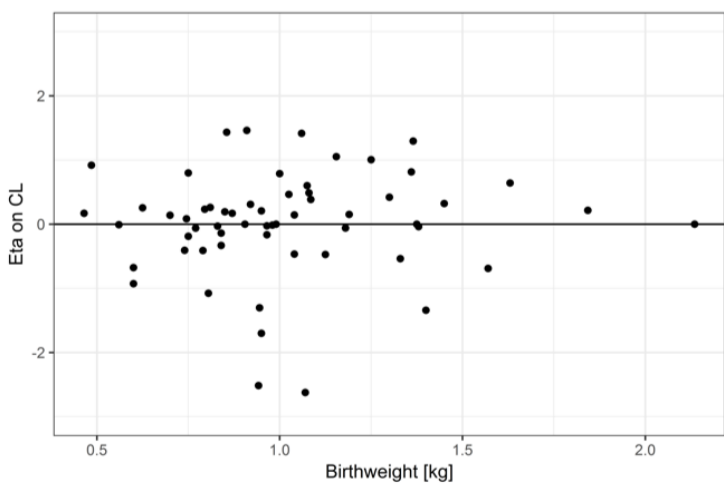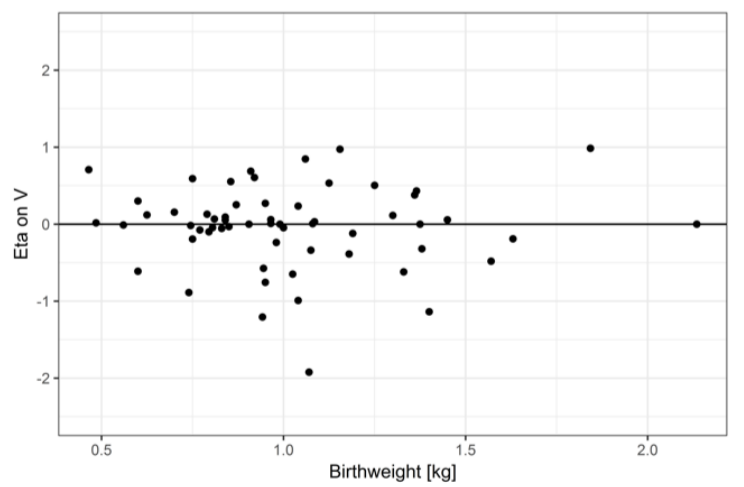

Supplement: JCPH-59-1300-s002.pdf [file JCPH-59-1300-s002.pdf]

Q-Q plot versus N(0,1) for npde

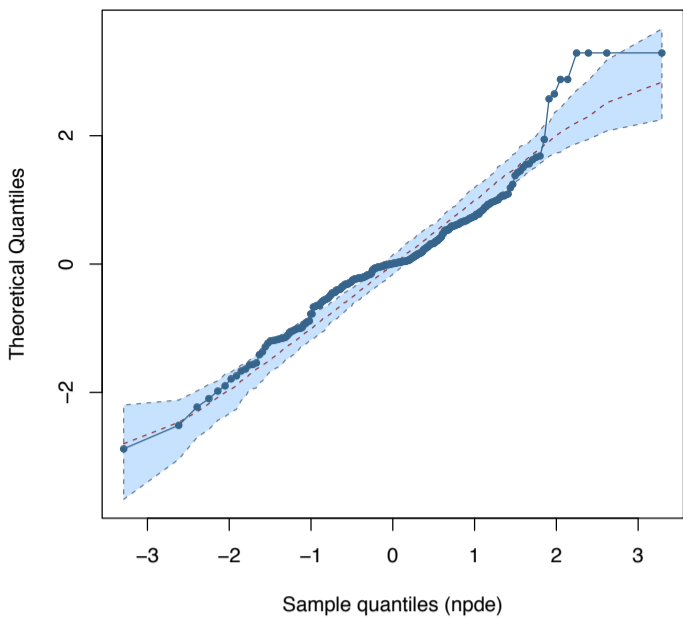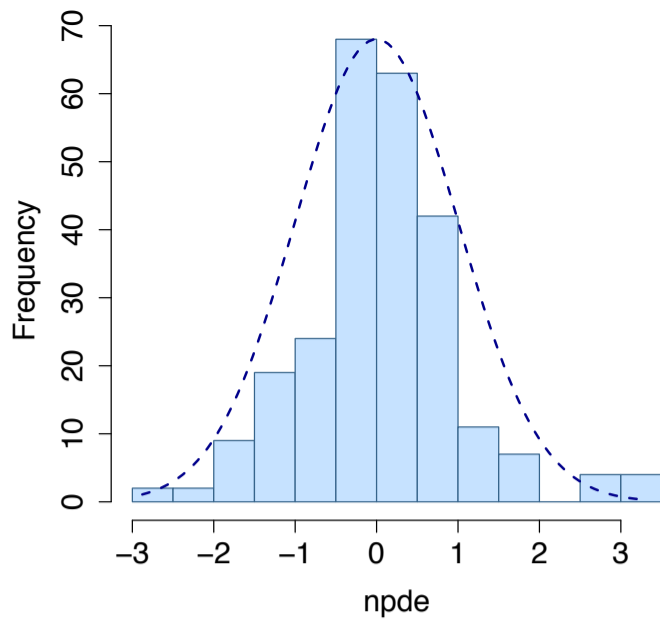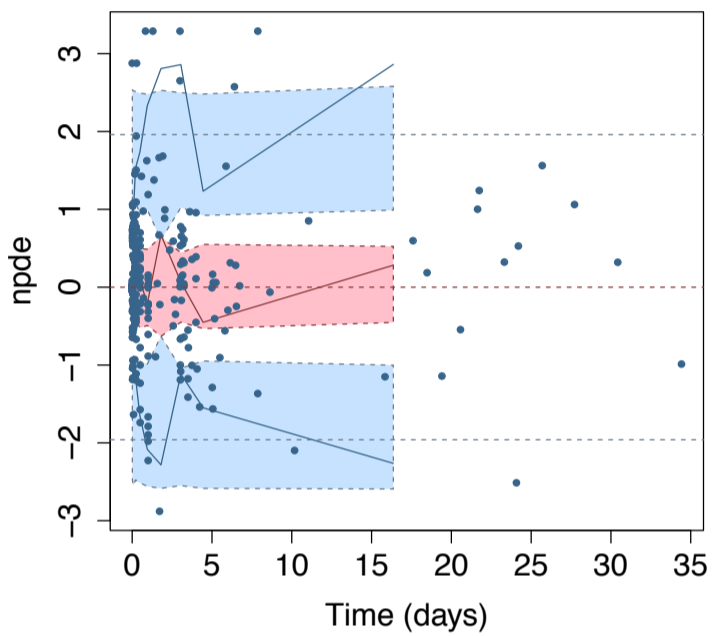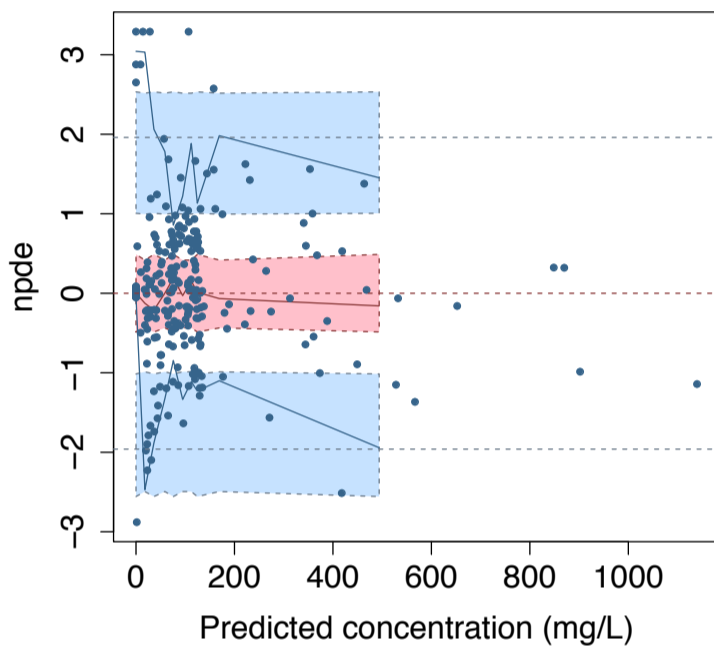

Supplement: JCPH-59-1300-s003.pdf [file JCPH-59-1300-s003.pdf]
